Ahier et al. Brief Report

1

2

3

4 **PINK1 and parkin shape the organism-wide distribution of a deleterious**  
5 **mitochondrial genome**

6

7

8 Arnaud Ahier<sup>1</sup>, Nadia Cummins<sup>1</sup>, Chuan-Yang Dai<sup>1</sup>, Jürgen Götz<sup>1</sup> and Steven  
9 Zuryn<sup>1\*</sup>.

10

11

12

13 <sup>1</sup> *Clem Jones Centre for Ageing Dementia Research, Queensland Brain Institute,*  
14 *The University of Queensland, Brisbane, Australia, 4072.*

15 *\*Corresponding author.*

16

17

18

19

20

21

22 Running title: PINK-1-parkin shape mutant mtDNA distribution

23

24 Keywords: Mitochondria, mtDNA, mitophagy, PINK1, parkin, heteroplasmy,  
25 proteotoxicity

Ahier et al. Brief Report

26

Ahier et al. Brief Report

27 **Abstract**

28

29 In multiple species, certain tissue types are prone to acquiring greater loads of  
30 mitochondrial genome (mtDNA) mutations relative to others, however the  
31 mechanisms that drive these heteroplasmy differences are unknown. We found that  
32 the conserved PTEN-induced putative kinase (PINK1/PINK-1) and the E3 ubiquitin-  
33 protein ligase parkin (PDR-1), which are required for mitochondrial autophagy  
34 (mitophagy), underlie stereotyped differences in heteroplasmy of a deleterious  
35 mitochondrial genome mutation ( $\Delta$ mtDNA) between major somatic tissues types in  
36 *Caenorhabditis elegans*. We demonstrate that tissues prone to accumulating  
37  $\Delta$ mtDNA have lower mitophagy responses than those with low mutation levels, such  
38 as neurons. Moreover, we show that  $\Delta$ mtDNA heteroplasmy increases when  
39 proteotoxic species that are associated with neurodegenerative disease and  
40 mitophagy inhibition are overexpressed in the nervous system. Together, these  
41 results suggest that PINK1 and parkin drive organism-wide patterns of heteroplasmy  
42 and provide evidence of a causal link between proteotoxicity, mitophagy, and mtDNA  
43 mutation levels in neurons.

44

45 **Introduction**

46

47 Mitochondria act as central hubs for cellular bioenergetics, macromolecule precursor  
48 synthesis, redox balance,  $\text{Ca}^{2+}$  handling, apoptosis, and immunity [1, 2]. They house  
49 their own genome (mtDNA), as well as RNA and protein-synthesizing systems,  
50 which together code and coordinate the assembly of core subunits of oxidative  
51 phosphorylation (OXPHOS). Mutations in the mtDNA that perturb the assembly of

Ahier et al. Brief Report

52 OXPHOS enzymes can cause devastating metabolic disorders [3]. The level of  
53 heteroplasmy of a pathogenic mtDNA mutation correlates with the severity of the  
54 clinical phenotype and mosaic distributions of mutations across an individual have  
55 been reported to lead to organ-specific dysfunction [4]. Heteroplasmy and mosaicism  
56 are therefore important determinants of mitochondrial disease pathophysiology.

57

58         The composition of the mitochondrial DNA (mtDNA) in each cell is in constant  
59 flux through processes of mutation, replication, and degradation. Mitotic segregation  
60 of mitochondria may result in asymmetric proportions of heteroplasmic allelic  
61 variants in descendant cellular lineages [5]. Alternatively, due to the high rate and  
62 relaxed replication of mtDNA, mosaicism can arise through clonal expansion and  
63 subsequent genetic drift between adjacent cells and tissues over time [6]. Indeed,  
64 there is continuous replication of mtDNA in all tissues, allowing variations in  
65 heteroplasmy to even develop between post-mitotic cells. Although there is evidence  
66 of selectivity [7], it is generally assumed that mitotic segregation and genetic drift are  
67 largely stochastic processes and therefore lead to random variation in mtDNA  
68 heteroplasmy and mosaicism within individuals [4]. Evidence in several species,  
69 however, suggests that differences in heteroplasmy between certain cell types is not  
70 random and may instead be deterministic. For example, relative to the rest of the  
71 human brain, the caudate, putamen and substantia nigra regions show an age-  
72 dependent increase in the heteroplasmy levels of the mtDNA<sup>4977</sup> deletion (a mutant  
73 genome harbouring a 4,977bp deletion) [8]. Heteroplasmy differences between  
74 tissues have also been observed in *C. elegans*. Here, mtDNA molecules harbouring  
75 a 3.1 kb deletion ( $\Delta$ mtDNA) accumulate at different heteroplasmy levels in distinct

Ahier et al. Brief Report

76 somatic and germ lineages over time [9, 10]. How different cell, tissue, or organ  
77 types reproducibly develop higher heteroplasmy levels than others is unclear.

78

79 By purifying and analysing mitochondria from different cell types, we show  
80 that PINK-1 and PDR-1 are required to set heteroplasmy differences between major  
81 somatic tissue groups in *C. elegans* and that removal of these genes equalises  
82  $\Delta$ mtDNA heteroplasmy across the organism. Mechanistically, our evidence indicates  
83 that heteroplasmy is lowered by PINK-1 and PDR-1 through the selective removal of  
84  $\Delta$ mtDNA, but to varying degrees of efficiency in different cell types with neurons,  
85 intestinal cells, and epidermal cells being more amenable to  $\Delta$ mtDNA clearance than  
86 body wall muscle cells. As a result, body wall muscle cells accumulate  $\Delta$ mtDNA at  
87 higher levels than the other tissues. Interestingly, we find that neurons, which have  
88 the greatest dependency upon PINK-1 and PDR-1 for maintaining low  $\Delta$ mtDNA  
89 heteroplasmy levels, are susceptible to increases in heteroplasmy caused by  
90 overexpressing either tau or polyglutamate repeats in the nervous system,  
91 proteotoxic species associated with neurodegenerative disease and mitophagy  
92 inhibition. Together, our results uncover a nuclear-encoded mechanism that  
93 determines organism-wide patterns of mtDNA heteroplasmy and establishes links  
94 between proteotoxicity, mitophagy, and mtDNA mutation levels in neurons.

95

## 96 **Results**

97

98 To understand the mechanisms that underlie the divergence in heteroplasmy levels  
99 between different tissue types within individuals, we took advantage of a strain of *C.*  
100 *elegans* that harbours a 3.1 kb deletion in its mitochondrial genome (*uaDf5*, also

Ahier et al. Brief Report

101 called  $\Delta$ mtDNA). This mutation exists in stable heteroplasmy of 50-60% (Figure S1A)  
102 and is deleterious for mitochondrial function as it disrupts four mtDNA genes that  
103 encode core subunits of the respiratory chain (Figure S1B). Worms harbouring the  
104 *uaDf5* allele at around 60% heteroplasmy display reductions in basal oxygen  
105 consumption and total respiratory capacity as well as constitutive induction of the  
106 mitochondrial unfolded protein response (UPR<sup>mt</sup>) [11, 12]. Because cellular  
107 heteroplasmy is determined by the net result of the propagation and degradation of  
108 mtDNA mutations, we investigated whether mitophagy, a process that can  
109 selectively destroy depolarized mitochondria harbouring mtDNA mutations, such as  
110  $\Delta$ mtDNA [11-13], may underlie tissue-specific heteroplasmy levels. To test this idea,  
111 we introduced the  $\Delta$ mtDNA mutation into double-mutant strains with null deletions in  
112 the genes *pink-1* and *pdr-1* [14], key mediators of mitophagy in multiple species  
113 including *C. elegans* [15-18]. PINK1/PINK-1 can induce mitophagy by accumulating  
114 on the outer mitochondrial membrane of defective organelles, where it recruits the  
115 E3 ubiquitin ligase parkin/PDR-1 [19]. Parkin/PDR-1 decorates the surface of these  
116 mitochondria with polyubiquitin chains, thereby inducing engulfment by  
117 autophagosomes and subsequent destruction following fusion with lysosomes [20].  
118 In some invertebrate species such as *Drosophila*, parkin can act independently of  
119 PINK1 during mitophagy [21], prompting us to use *pink-1(tm1779);pdr-1(gk448)*  
120 double mutants to unambiguously disrupt mitophagy in *C. elegans*. *Pink-*  
121 *1(tm1779);pdr-1(gk448)* double mutants harbouring heteroplasmic  $\Delta$ mtDNA were  
122 crossed to a series of transgenic strains carrying a *TOMM-20::mKate2::HA*  
123 transgene under the control of either the promoter of the gene *myo-3*, *ges-1*, *rgef-1*,  
124 or *dpy-7* which selectively drive body wall muscle, intestinal, panneuronal, and  
125 epidermal expression, respectively (Figure 1A). We also generated a similar strain

Ahier et al. Brief Report

126 which carried the transgene *TOMM-20::mKate2::HA* under the ubiquitous control of  
127 the promoter of *eft-3*. Intact mitochondria were isolated from each of the strains  
128 above, as well as wild-type animals in which mitophagy was unperturbed. This was  
129 performed by using immunoprecipitation against the HA epitope, which labelled the  
130 outer surface of the mitochondria because of its attachment to the C-terminus of  
131 TOMM-20 [9]. In doing so, we were able to selectively purify mitochondria from each  
132 tissue type in which the *TOMM-20::mKate2::HA* transgene was expressed.

133

134 Heteroplasmy comparisons in animals expressing *eft-3p::TOMM-*  
135 *20::mKate2::HA* revealed that there was no relative difference in  $\Delta$ mtDNA levels  
136 between immunoprecipitated mitochondria and total (non-affinity purified input  
137 sample) mitochondria (Figure 1B). This was as expected and indicated that the  
138 mitochondrial isolation procedure used did not artificially alter heteroplasmy level  
139 measurements made in either wild-type or *pink-1(tm1779);pdr-1(gk448)*  
140 backgrounds. Comparisons in relative  $\Delta$ mtDNA levels made between mitochondria  
141 purified from each tissue type in wild-type worms revealed that neurons, intestinal  
142 cells, epidermal cells, and body wall muscle cells displayed distinct and reproducible  
143 differences in  $\Delta$ mtDNA heteroplasmy relative to each other (Figures 1C-F), with  
144 muscle cells always harbouring the highest load of mutations of any somatic tissue  
145 type studied (Figure 1G)[9]. Interestingly, these intertissue differences in  
146 heteroplasmy were abolished in *pink-1(tm1779);pdr-1(gk448)* mutants (Figure 1H  
147 and 1I), suggesting that the activities of *pink-1* and *pdr-1*, two nuclear-encoded  
148 genes, were required for setting distinct and stereotyped patterns of heteroplasmy in  
149 major somatic tissues of *C. elegans*. This equalisation effect wasn't caused by global  
150 changes in mtDNA copy number, as *pink-1(tm1779);pdr-1(gk48)* mutants had normal

Ahier et al. Brief Report

151 levels of mtDNA (Figure 1J). At the level of individual tissues in *pink-1(tm1779);pdr-*  
152 *1(gk488)* double mutants, we observed increases in heteroplasmy in neurons,  
153 intestinal cells, and epidermal cells (Figure 1C-E), but no alteration in  $\Delta$ mtDNA levels  
154 in body wall muscle cells (Figure 1F). This suggested that *pink-1* and *pdr-1* acted  
155 only in select cell types to remove  $\Delta$ mtDNA, leading to stereotyped differences in  
156 heteroplasmy between tissues over time.

157

158 Because these results indicated that *pink-1* and *pdr-1* did not influence  
159 heteroplasmy in muscle cells, we hypothesised that the genes were either inactive or  
160 that they had different functions that did not include  $\Delta$ mtDNA clearance in this tissue  
161 type. However, we found that *pink-1* was expressed in body wall muscle cells, as  
162 indicated by a *pink-1p::PINK-1::GFP* [22] transgene in live animals (Figure 2A).  
163 Because a translational GFP::PDR-1 reporter is also expressed in body wall muscles  
164 in *C. elegans* [14], it is likely that PINK-1-PDR-1-mediated mitophagy is active in this  
165 tissue. In *C. elegans*, mitophagy can be monitored through the colocalization of  
166 mitochondria with autophagosomes, which defines one of the terminal stages of  
167 mitophagy prior to lysosomal fusion and the destruction of encapsulated mitochondria  
168 [16, 23]. By quantifying the colocalization of *myo-3p::TOMM-20::mKate2::HA* and  
169 *lgg-1p::LGG-1::GFP* [24], which label muscle mitochondria and autophagosomes,  
170 respectively, we determined that mitophagy was inhibited in the body wall muscle  
171 cells of *pink-1(tm1779);pdr-1(gk488)* worms (Figure 2B). Indeed, in these mutants,  
172 using multiple fluorescent markers (*myo-3p::TOMM-20::mKate2::HA* and *myo-*  
173 *3p::<sup>MTS</sup>RFP*) and three-dimensional reconstruction of high magnification images, we  
174 also observed a dramatic increase in total mitochondrial muscle volume (Figure 2C,  
175 D and Figure S3), suggesting that the mitochondrial network increased in size in the



Ahier et al. Brief Report

176 absence of mitophagy-mediated turnover. Together, these results indicate that *pink-*  
177 *1* and *pdr-1* are active and required for mitophagy in muscle cells in *C. elegans*,  
178 consistent with previous findings [16].

179

180 Mitophagy is initiated by the stabilisation of PINK1 on the surface of  
181 depolarised mitochondria. However, although mitochondria are ubiquitous, they can  
182 exhibit cell-type specific morphologies, dynamics, and functions and as such,  
183 mitochondria from distinct cell-types may respond physiologically differently to the  
184 presence of  $\Delta$ mtDNA in a manner that impinges on mitophagy and therefore  
185  $\Delta$ mtDNA clearance. For example, if the mitochondrial membrane potential (MMP) is  
186 unaffected by  $\Delta$ mtDNA in muscle cells, it is possible that mitochondria harbouring  
187  $\Delta$ mtDNA may not be recognised and removed via mitophagy. To investigate this  
188 possibility further, we compared the effects of  $\Delta$ mtDNA in body wall muscle cells and  
189 neurons, two cell types with opposite heteroplasmy trends (Figure 1C and F).  
190 Although gross mitochondrial morphology and volume appeared to be unaffected by  
191  $\Delta$ mtDNA (Figure S3), we found that  $\Delta$ mtDNA induced a decrease in the MMP in both  
192 muscle and neural mitochondria to the same degree (Figure 3A and B). Furthermore,  
193 we found that total mtDNA copy number increased in mitochondria purified from  
194 muscle cells and neurons, which is likely to be a compensatory response to  
195 mitochondrial dysfunction caused by the presence of  $\Delta$ mtDNA (Figure 3C). This  
196 suggests that  $\Delta$ mtDNA invokes comparable levels of mitochondrial dysfunction and  
197 depolarisation in muscle cells and neurons and that tissue-specific differences in  
198 heteroplasmy, as determined by *pink-1* and *pdr-1* activities, are not attributable to  
199 intrinsic differences in mitochondrial physiology between cell types.

200

Ahier et al. Brief Report

201           Although *pink-1* and *pdr-1* are expressed and are required for mitophagy in  
202 both body wall muscle (Figure 2B) and neurons, as we showed previously in *C.*  
203 *elegans* [15], it is possible that mitophagy responds differently to the presence of  
204  $\Delta$ mtDNA in each cell type, which may affect its clearance. We compared tissue-  
205 specific levels of mitophagy in the nervous system and body wall muscle in wild-type  
206 animals and animals harbouring  $\Delta$ mtDNA by determining the percentage overlap  
207 (volume:volume) of mitochondria (muscle, *myo-3p::TOMM-20::mKate2::HA*; neural  
208 *rgef-1p::TOMM-20::mKate2::HA*) to autophagosomes (*lgg-1p::LGG-1::GFP*).  
209 Interesting, we found that mitophagy was induced by the presence of  $\Delta$ mtDNA in  
210 both cell types, suggesting that mtDNA mutations can directly activate mitochondrial  
211 clearance pathways *in vivo* (Figure 3D). More importantly, we found that relative to  
212 mitochondrial volume, there was much more basal mitophagy in neurons compared  
213 to muscle cells. Moreover, although both tissue types responded to the presence of  
214  $\Delta$ mtDNA by increasing mitophagy, the neural response was much greater than that  
215 in muscle (Figure 3D). This suggests that mitophagy has a greater capacity to  
216 respond to  $\Delta$ mtDNA in the nervous system than in muscle and could therefore  
217 explain why neurons have lower heteroplasmy levels than muscle and why  
218 mutations in *pink-1* and *pdr-1(gk488)* have a greater effect on heteroplasmy in the  
219 nervous system.

220

221           Because our results indicated that  $\Delta$ mtDNA strongly induces mitophagy in the  
222 neurons and that the activity of PINK-1-PDR-1-mediated mitophagy is important in  
223 the nervous system for maintaining low levels of heteroplasmy, we next determined  
224 whether other cellular conditions that perturbed mitophagy could raise  $\Delta$ mtDNA  
225 levels in these cells types. We recently demonstrated that proteotoxic tau, a protein

Ahier et al. Brief Report

226 that forms aggregates in tauopathies such as Alzheimer's disease [25], perturbs  
227 parkin translocation to the mitochondria, and that human tau expressed in the *C.*  
228 *elegans* nervous system inhibits mitophagy [15]. To determine whether this  
229 increased heteroplasmy levels in neurons, we constructed strains harbouring  
230  $\Delta$ mtDNA and expressing human tau (hTau) in the nervous system (*aex-3p::hTau*)  
231 [15] as well as the neuron-specific *rgef-1p::TOMM-20::mKate2::HA* transgene  
232 (Figure 4A). We then immunoprecipitated neuronal mitochondria in these strains and  
233 found that hTau significantly increased heteroplasmy (Figure 4B), suggesting that  
234 the expression of mitophagy-inhibiting proteins can increase  $\Delta$ mtDNA levels in  
235 neurons. Other proteotoxic species have also recently been found to inhibit  
236 mitophagy in neurons. The expanded polyglutamine (polyQ) tract in mutant forms of  
237 the Huntingtin protein (Htt) that cause Huntington disease were recently reported to  
238 impede mitophagy in differentiated striatal neurons [26]. Indeed, we found that the  
239 expression of a polyglutamine (polyQ) tract (*rgef-1p::Q40::YFP*) [27] in the *C.*  
240 *elegans* nervous system recapitulated the effect of hTau and increased  $\Delta$ mtDNA  
241 heteroplasmy in neurons (Figure 4B). These results suggest that diverse proteotoxic  
242 threats associated with a broad range of neurodegenerative diseases may promote  
243 the accumulation of mtDNA deletions in the nervous system.

244

## 245 **Discussion**

246

247 Stochastic processes such as mitotic segregation and genetic drift influence cellular  
248 heteroplasmy [4]. However, certain tissues are prone to accumulating mtDNA  
249 mutations, implying that cell-type specific events deterministically set heteroplasmy  
250 levels. Our results suggest that cell-type differences in the activity and

Ahier et al. Brief Report

251 responsiveness of mitophagy, mediated through *pink-1* and *pdr-1*, contribute to the  
252 intertissue divergence in heteroplasmy of a deleterious mitochondrial genome. We  
253 showed that deletion of *pink-1* and *pdr-1* equalised heteroplasmy levels across  
254 tissues that normally display stereotypical differences in  $\Delta$ mtDNA heteroplasmy.  
255 Comparisons between body wall muscle cells and neurons revealed that although  
256 active in both tissues, mitophagy responded to  $\Delta$ mtDNA at greater levels relative to  
257 total mitochondrial volume in neurons than muscle, leading to higher  $\Delta$ mtDNA  
258 heteroplasmy in muscle. Furthermore, we have demonstrated that proteotoxic  
259 threats that can perturb mitophagy in neurons can increase heteroplasmy levels in  
260 the nervous system. Taken together, our results suggest a model (Figure 4C)  
261 whereby organism-wide patterns of heteroplasmy of mtDNA deletions are  
262 determined by the activity of PINK-1-PDR-1-mediated mitophagy and that genetic  
263 perturbations and disease-related proteotoxic threats that perturb mitophagy can  
264 increase the abundance of mtDNA mutations in the nervous system of an organism.

265

266 In humans, large mtDNA deletions have been shown to accumulate in specific  
267 regions of the brain during ageing [8]. Although there is strong evidence that PINK1-  
268 parkin-mediated mitophagy occurs in mammalian neurons [28, 29], it is not known  
269 whether differences in the activity of mitophagy plays a role in specifying the  
270 heteroplasmy levels of mtDNA deletions within distinct regions of the brain. In mice  
271 homozygous for a proofreading deficiency in DNA polymerase  $\gamma$ , which induces a  
272 high level of mtDNA single nucleotide mutations [30, 31], parkin knockout  
273 significantly increases the levels of pathogenic mtDNA mutations in the striatum [32].  
274 Moreover, mutations in Pink1 [33] and parkin [34] can lead to early onset Parkinson's  
275 disease, and substantia nigra neurons in Parkinson's disease patients have high

Ahier et al. Brief Report

276 levels of mtDNA deletions [35, 36]. Although we did not examine subsets of neurons  
277 in this study, our results suggest that neurons in general are the most vulnerable to  
278 increases in heteroplasmy when mitophagy is perturbed. Therefore, our work  
279 demonstrates that mutations in Pink1 and parkin have a widely conserved effect  
280 across phyla of enhancing the accumulation of mtDNA deletions in neurons, which  
281 may perturb their function and cause disease. It will be interesting to determine  
282 whether these principles are specific to mtDNA deletions or other types of mtDNA  
283 mutations as well.

284

285 In addition to Pink1 and parkin mutations, we found that toxic proteins  
286 associated with neurodegenerative diseases other than Parkinson's disease also  
287 increase heteroplasmy. Overexpression in neurons of hTau, as well as a polyQ tract,  
288 significantly increased  $\Delta$ mtDNA heteroplasmy levels in the *C. elegans* nervous  
289 system. To our knowledge, this represents the first reported incidence of  
290 proteotoxicity increasing the cellular load of mtDNA mutations. Interestingly, similar  
291 proteotoxic species have been recently reported to inhibit mitophagy in neurons. Via  
292 its projection domain, hTau can associate with Parkin in the cytoplasm and  
293 specifically impair its translocation to the surface of defective mitochondria in human  
294 neuroblastoma cells [15]. In addition, a polyQ tract within expanded mutant versions  
295 of the Huntingtin protein can prevent the formation of the Beclin1-Vps34 initiation  
296 complex, negatively affecting the efficiency of mitophagy in post-mitotic striatal  
297 neurons [26]. These results demonstrate that perturbing mitophagy indirectly with  
298 proteotoxicity has the same effect as perturbing mitophagy genetically through  
299 mutations in *pink-1* and *pdr-1*. They also demonstrate that toxic proteins associated  
300 with diverse neurodegenerative diseases can modify the genetic landscape of the

Ahier et al. Brief Report

301 mitochondrial genome in neurons and provide evidence that two of the most  
302 common hallmarks of neurodegeneration - proteotoxicity and mitochondrial  
303 dysfunction - may converge at the level of the mitochondrial genome.

304

## 305 **Materials and Methods**

306

307 **C. elegans strains and culture.** LB138 *him-8(e1489) IV; uaDf5/+*; EG8078 *oxTi185*  
308 *I; unc-119(ed3) III*; BR4006 *pink-1(tm1779) II*; byEx655 [*pink-1p::pink-1::GFP; myo-*  
309 *2p::mCherry; herring sperm DNA*]; VC1024 *pdr-1(gk448) III*; AM101 *rmls110 [rgef-*  
310 *1p::Q40::YFP*], SJ4103 *zcls14 [myo-3p::GFP<sup>mt</sup>]*, MAH235 *scls13[lgg-1p::gfp::lgg-1 +*  
311 *odr-1p::RFP]* [24] and wild-type (N2) were acquired from the *Caenorhabditis*  
312 Genetics Center (CGC), University of Minnesota, USA, which is funded by the NIH  
313 Office of Research Infrastructure Programs (P40 OD010440). APD178 *apdls11 [aex-*  
314 *3p::tau4RIN + coel::gfp]* were kindly provided by Dr H. Nicholas (The University of  
315 Sydney, Sydney, Australia). QH5425 *vdls30 [unc-25p::MTS::mRFP + odr-1p::dsRed]*  
316 was kindly provided as a gift by Dr M. Hilliard and J. Chaplin (The University of  
317 Queensland, Queensland Brain Institute, Brisbane, Australia). *C. elegans* culture and  
318 maintenance were performed according to standard protocols [37]. The transgenic  
319 strains used for cell-specific mitochondrial purification experiments, *foxSi16[myo-*  
320 *3p::TOMM-20::mKate2::HA]*, *foxSi37 [ges-1p::TOMM-20::mKate2::HA]*, *foxSi41[dpy-*  
321 *7p::TOMM-20::mKate2::HA]*, *foxSi44[rgef-1p::TOMM-20::mKate2::HA]*, *foxSi75[eft-*  
322 *3p::TOMM-20::mKate2::HA]* and *foxSi2[myo-3p::<sup>MTS</sup>RFP]* were used were  
323 generated as previously described [9].

324

Ahier et al. Brief Report

325 **Cell-specific mitochondrial affinity purification (CS-MAP).** CS-MAP was  
326 performed as previously described [9]. Heteroplasmy in mitochondria derived from  
327 different cell types was investigated across very large populations of pooled animals  
328 (>10,000 individuals). This approach enabled population-scale trends to be resolved  
329 by overcoming confounding influences that can be introduced by the presence of  
330 stochastic inter-individual variations. Briefly, 10,000 to 20,000 L4 staged worms were  
331 grown on 2 x 150 mm NGM plates seeded with *E. coli* OP50 bacteria. We chose L4  
332 animals as it represents a stage in which all somatic tissues are fully formed (e.g.  
333 nervous system and epidermal seam cells) and developing embryos are not yet  
334 present in the gonads of animals. Worms were homogenized into a hypotonic buffer  
335 [50 mM KCl, 110 mM mannitol, 70 mM sucrose, 0.1 mM EDTA (pH 8.0), 5 mM Tris-  
336 HCl (pH 7.4)] with a dounce homogenizer and the subsequent crude mitochondrial  
337 fraction was enriched by differential centrifugations. The mitochondria were then  
338 isolated from this fraction using anti-HA (influenza hemagglutinin) magnetic beads  
339 (Pierce). The beads were washed and resuspended in 20  $\mu$ l of hypotonic buffer. All  
340 CS-MAP experiments were repeated in at least three independent experiments and  
341 data for each genetic background were obtained at similar times to those previously  
342 reported for control wild-type backgrounds [9]. To eliminate the possibility of any  
343 population variability affecting our analyses, we compared mitochondria purified from  
344 each tissue to the total mitochondria (homogenate) from the same samples.

345

346 **mtDNA extraction and quantitative PCR of heteroplasmy.** For all mtDNA  
347 analyses, total input and affinity-purified mitochondria were lysed and extracted  
348 using phenol-chloroform-isoamyl alcohol, followed by an ethanol precipitation.  
349 Extracted DNA was resuspended in 10 mM Tris-HCl (pH 8), 0.1 mM EDTA. Multiplex

Ahier et al. Brief Report

350 quantitative PCR was then performed using the Luna Universal Probe qPCR Master  
351 Mix (ref M3004, NEB), a Roche LightCycler or Rotor Gene Q real-time PCR (Qiagen)  
352 machine and Rotor Gene Q pure detection software (V2.3.1). The primers 5'-  
353 cgtaagaaaatcaaaatattggtataattgg-3', 5'-aaaatggtacgatccttattaataaagc-3', 5'-  
354 gcagagatgtttattgaagctgac-3' and the probes 5'-HEX/tgaggccag/ZEN/ttcatattgtccaga  
355 gtg/IABKFQ-3' (Iowa Black FQ) and 5'-6-  
356 FAM/ccatccgtg/ZEN/ctagaagacaagaatttc/IABKFQ-3' were used to quantify the wild-  
357 type mtDNA and  $\Delta$ mtDNA levels. Calculations of mtDNA copies per mitochondrion  
358 were derived from the quantification of purified organelles in individual samples, as  
359 previously performed [9]. Control wild-type values have been previously reported by  
360 Ahier et al., 2018 [9].

361

### 362 **Quantification of mtDNA copy number**

363 Ten (10) L4 worms from each genetic background were lysed in 10  $\mu$ l of standard  
364 lysis buffer supplemented with 200  $\mu$ g  $\text{ml}^{-1}$  proteinase K and incubated at 65°C  
365 for 2 h, followed by heat-inactivation at 95°C for 15 min. A 1/50 dilution of the  
366 lysate was used for subsequent quantitative PCR. The Sensifast SYBR no-rox Kit  
367 (ref. BIO-98005, Biorline) and a Rotor Gene Q Real-Time PCR (Qiagen) Machine,  
368 with Rotor Gene Q pure detection software (V2.3.1), were used for quantitative PCR  
369 (qPCR). The primers SZ35 (5'-AGGCTAAGCCGGGGTAAGTT-3') and SZ36 (5'-  
370 GCCAAAAGCTTAAACTGCGG-3') were used to quantify the nuclear DNA and the  
371 primers AA178 (5'-CATACCGAATAAACATCAGGGTAATCT-3'), AA179 (5'-  
372 ACGGGTGTACTACTATGATGAAGA-3') were used to quantify the mtDNA levels.  
373 The cycle conditions were 95°C for 10 min, followed by 45 cycles of 95°C for 15 s  
374 and 58°C for 40 s. Primer efficiencies were determined by amplifying a series of



Ahier et al. Brief Report

375 exponential dilutions (1 to  $10^{-8}$  ng) of cloned wild-type mtDNA (pSZ116) and *ges-1*  
376 promoter (pSZ57) fragments, confirming an equivalent efficiency of both sets of  
377 primers (91.2% for SZ35 and SZ36 and 90.6% for AA178 and AA179).

378

379 **Image acquisition and processing.** Imaging was performed on live animals  
380 mounted on a 2% agarose pad on glass slides with 1 mM levamisole (Sigma). For  
381 quantification of purified mitochondria and mitochondrial membrane potential, we  
382 visualized fluorescence using a Zeiss Z2 imager microscope with a Zeiss Axiocam  
383 506 mono camera and Zen2 (version 2.0.0.0) software. Mitochondria were counted  
384 with the aid of the Image J Grid plugin, and comparisons were made on the same  
385 immunoprecipitation volume for each sample. For 3D reconstruction,  
386 imaging/analysis was performed at the Queensland Brain Institute's Advanced  
387 Microscopy Facility using a spinning-disk confocal system (Marianas; 3I, Inc.)  
388 consisting of an Aario Observer Z1 (Carl Zeiss) equipped with a CSU-W1 spinning-  
389 disk head (Yokogawa Corporation of America), ORCA-Flash4.0 v2 sCMOS camera  
390 (Hamamatsu Photonics), and 20x 0.8 NA PlanApo and 40x 1.2 NA C-Apo objectives.  
391 Image acquisition was performed using SlideBook 6.0 (3I, Inc). 3D reconstruction  
392 and mitochondrial volume calculations were performed using 3D rendering in Imaris  
393 software (version 8.4.1, Bitplane). For all mitochondrial and mitophagy volume  
394 measurements, 100x magnification was used and representative images depict  
395 multiple images stitched together and straightened using image J.

396

397 **Mitochondrial membrane potential.** Mitochondrial membrane potential was  
398 measured by observing mitochondrial accumulation of the fluorescent dye  
399 tetramethylrhodamine ethyl ester (TMRE; Sigma), as previously described [38, 39].

Ahier et al. Brief Report

400 Briefly, 1-day old adult animals were transferred to growth plates seeded with 200  $\mu$ l  
401 of M9 buffer containing 1 mM of TMRE. Animals were allowed to grow for 15 hours  
402 on the plates before being transferred to growth plates without TMRE for 5 hours to  
403 allow excess dye to be cleared from the intestinal cavity. Live animals were then  
404 prepared for fluorescence microscopy, as described above. To quantify the amount  
405 of dye accumulation in mitochondria from each tissue type, a region of interest was  
406 selected from images (40x magnification) containing mitochondria labelled with GFP  
407 fused to an MTS and driven under promoters that express in either body wall muscle  
408 (*myo-3p::GFP<sup>mt</sup>*) [40], or the PLM neuron (*mec-4p::<sup>MTS</sup>GFP*) [41]. Mean TMRE  
409 intensity was calculated for mitochondria of individual animals using Image J  
410 software.

411

412 **Statistics and reproducibility.** The statistical analyses are described for each  
413 figure. Generally, an unpaired parametric two-tailed *t*-test was used to determine the  
414 significance of comparisons made between two data sets, unless otherwise noted in  
415 the figure legend. One-way analysis of variance (ANOVA) was performed for  
416 comparisons across multiple independent samples, using Tukey's multiple  
417 comparisons correction. All experiments were reproduced at least 3 times with  
418 similar results. All data and biological reagents that support the conclusions of this  
419 manuscript are available from the corresponding author on request.

420

#### 421 **Acknowledgements**

422 We are grateful to M. Hilliard and R. Tweedale for comments on the manuscript and  
423 members of the Zuryn laboratory for discussions and comments. We also thank A.  
424 Gaudin for support with microscopy. Some strains were provided by the CGC, which

Ahier et al. Brief Report

425 is funded by the NIH Office of Research Infrastructure Programs (P40 OD010440).  
426 This work was supported by NHMRC Project Grants GNT1128381 (S.Z.) and  
427 GNT1162553 (S.Z.), ARC Discovery grants DP200101630 (S.Z.) and DP160103812  
428 (J.G.), a Clem Jones Centre for Ageing Dementia Flagship grant (S.Z.), a Stafford  
429 Fox Senior Research Fellowship to S.Z., and a University of Queensland  
430 International Scholarship to C.Y.D.

431

#### 432 **Author contributions**

433 A.A. carried out most experiments. N.C., C.Y.D., S.Z. contributed some experiments.  
434 J.G. supervised N.C. and contributed to the interpretation of experiments. A.A., N.C.,  
435 C.Y.D and S.Z. designed and interpreted experiments. A.A. and S.Z. wrote the  
436 paper. All authors approved the final manuscript.

437

#### 438 **Conflict of interest**

439 The authors declare that they do not have any financial or non-financial competing  
440 interests.

441

442

443

444 **References**

- 445 1. West AP, Shadel GS (2017) Mitochondrial DNA in innate immune responses and  
446 inflammatory pathology. *Nat Rev Immunol* **17**: 363-375
- 447 2. Spinelli JB, Haigis MC (2018) The multifaceted contributions of mitochondria to  
448 cellular metabolism. *Nat Cell Biol* **20**: 745-754
- 449 3. Gorman GS, Chinnery PF, DiMauro S, Hirano M, Koga Y, McFarland R, Suomalainen A,  
450 Thorburn DR, Zeviani M, Turnbull DM (2016) Mitochondrial diseases. *Nat Rev Dis Primers* **2**:  
451 16080
- 452 4. Hahn A, Zuryn S (2019) The Cellular Mitochondrial Genome Landscape in Disease.  
453 *Trends Cell Biol* **29**: 227-240
- 454 5. Wilton PR, Zaidi A, Makova K, Nielsen R (2018) A Population Phylogenetic View of  
455 Mitochondrial Heteroplasmy. *Genetics* **208**: 1261-1274
- 456 6. Carelli V, Maresca A, Caporali L, Trifunov S, Zanna C, Rugolo M (2015) Mitochondria:  
457 Biogenesis and mitophagy balance in segregation and clonal expansion of mitochondrial  
458 DNA mutations. *Int J Biochem Cell Biol* **63**: 21-4
- 459 7. Katajisto P, Dohla J, Chaffer CL, Pentimikko N, Marjanovic N, Iqbal S, Zoncu R, Chen  
460 W, Weinberg RA, Sabatini DM (2015) Asymmetric apportioning of aged mitochondria  
461 between daughter cells is required for stemness. *Science* **348**: 340-343
- 462 8. Soong NW, Hinton DR, Cortopassi G, Arnheim N (1992) Mosaicism for a Specific  
463 Somatic Mitochondrial-DNA Mutation in Adult Human Brain. *Nature Genetics* **2**: 318-323
- 464 9. Ahier A, Dai C-Y, Tweedie A, Bezawork-Geleta A, Kirmes I, Zuryn S (2018) Affinity  
465 purification of cell-specific mitochondria from whole animals resolves patterns of genetic  
466 mosaicism. *Nat Cell Biol* **20**: 352-360
- 467 10. Liao WS, Gonzalez-Serricchio AS, Deshommes C, Chin K, LaMunyon CW (2007) A  
468 persistent mitochondrial deletion reduces fitness and sperm performance in heteroplasmic  
469 populations of *C. elegans*. *BMC Genet* **8**: 8
- 470 11. Lin YF, Schulz AM, Pellegrino MW, Lu Y, Shaham S, Haynes CM (2016) Maintenance  
471 and propagation of a deleterious mitochondrial genome by the mitochondrial unfolded  
472 protein response. *Nature* **533**: 416-9
- 473 12. Gitschlag BL, Kirby CS, Samuels DC, Gangula RD, Mallal SA, Patel MR (2016)  
474 Homeostatic Responses Regulate Selfish Mitochondrial Genome Dynamics in *C. elegans*. *Cell*  
475 *Metab* **24**: 91-103
- 476 13. Tsang WY, Lemire BD (2002) Stable heteroplasmy but differential inheritance of a  
477 large mitochondrial DNA deletion in nematodes. *Biochem Cell Biol* **80**: 645-54

Ahier et al. Brief Report

- 478 14. Springer W, Hoppe T, Schmidt E, Baumeister R (2005) A *Caenorhabditis elegans*  
479 Parkin mutant with altered solubility couples alpha-synuclein aggregation to proteotoxic  
480 stress. *Hum Mol Genet* **14**: 3407-23
- 481 15. Cummins N, Tweedie A, Zuryn S, Bertran-Gonzalez J, Götz J (2019) Disease-  
482 associated tau impairs mitophagy by inhibiting Parkin translocation to mitochondria. *EMBO*  
483 *J* **38**
- 484 16. Palikaras K, Lionaki E, Tavernarakis N (2015) Coordination of mitophagy and  
485 mitochondrial biogenesis during ageing in *C. elegans*. *Nature* **521**: 525-8
- 486 17. Kirienko NV, Ausubel FM, Ruvkun G (2015) Mitophagy confers resistance to  
487 siderophore-mediated killing by *Pseudomonas aeruginosa*. *Proc Natl Acad Sci U S A* **112**:  
488 1821-6
- 489 18. Ryu D, Mouchiroud L, Andreux PA, Katsyuba E, Moullan N, Nicolet-Dit-Felix AA,  
490 Williams EG, Jha P, Lo Sasso G, Huzard D, *et al.* (2016) Urolithin A induces mitophagy and  
491 prolongs lifespan in *C. elegans* and increases muscle function in rodents. *Nat Med* **22**: 879-  
492 88
- 493 19. Palikaras K, Lionaki E, Tavernarakis N (2018) Mechanisms of mitophagy in cellular  
494 homeostasis, physiology and pathology. *Nat Cell Biol* **20**: 1013-1022
- 495 20. Harper JW, Ordureau A, Heo JM (2018) Building and decoding ubiquitin chains for  
496 mitophagy. *Nat Rev Mol Cell Biol* **19**: 93-108
- 497 21. Park J, Lee SB, Lee S, Kim Y, Song S, Kim S, Bae E, Kim J, Shong MH, Kim JM, *et al.*  
498 (2006) Mitochondrial dysfunction in *Drosophila* PINK1 mutants is complemented by parkin.  
499 *Nature* **441**: 1157-1161
- 500 22. Samann J, Hegermann J, von Gromoff E, Eimer S, Baumeister R, Schmidt E (2009)  
501 *Caenorhabditis elegans* LRK-1 and PINK-1 act antagonistically in stress response and neurite  
502 outgrowth. *J Biol Chem* **284**: 16482-91
- 503 23. Palikaras K, Tavernarakis N (2017) Assessing Mitochondrial Selective Autophagy in  
504 the Nematode *Caenorhabditis elegans*. *Methods Mol Biol* **1567**: 349-361
- 505 24. Lapierre LR, De Magalhaes Filho CD, McQuary PR, Chu CC, Visvikis O, Chang JT,  
506 Gelino S, Ong B, Davis AE, Irazoqui JE, *et al.* (2013) The TFEB orthologue HLH-30 regulates  
507 autophagy and modulates longevity in *Caenorhabditis elegans*. *Nat Commun* **4**: 2267
- 508 25. Polanco JC, Li C, Bodea LG, Martinez-Marmol R, Meunier FA, Götz J (2018) Amyloid-  
509 beta and tau complexity - towards improved biomarkers and targeted therapies. *Nat Rev*  
510 *Neurol* **14**: 22-39
- 511 26. Franco-Iborra S, Plaza-Zabala A, Sebastian D, Vila M, Martinez-Vicente M (2019)  
512 Impairment of neuronal mitophagy by mutant huntingtin. *bioRxiv*

Ahier et al. Brief Report

- 513 27. Gidalevitz T, Ben-Zvi A, Ho KH, Brignull HR, Morimoto RI (2006) Progressive  
514 disruption of cellular protein folding in models of polyglutamine diseases. *Science* **311**:  
515 1471-4
- 516 28. Ashrafi G, Schlehe JS, LaVoie MJ, Schwarz TL (2014) Mitophagy of damaged  
517 mitochondria occurs locally in distal neuronal axons and requires PINK1 and Parkin. *J Cell*  
518 *Biol* **206**: 655-70
- 519 29. Bingol B, Tea JS, Phu L, Reichelt M, Bakalarski CE, Song Q, Foreman O, Kirkpatrick DS,  
520 Sheng M (2014) The mitochondrial deubiquitinase USP30 opposes parkin-mediated  
521 mitophagy. *Nature* **510**: 370-5
- 522 30. Trifunovic A, Wredenberg A, Falkenberg M, Spelbrink JN, Rovio AT, Bruder CE,  
523 Bohlooly YM, Gidlof S, Oldfors A, Wibom R, *et al.* (2004) Premature ageing in mice  
524 expressing defective mitochondrial DNA polymerase. *Nature* **429**: 417-23
- 525 31. Kujoth GC, Hiona A, Pugh TD, Someya S, Panzer K, Wohlgemuth SE, Hofer T, Seo AY,  
526 Sullivan R, Jobling WA, *et al.* (2005) Mitochondrial DNA mutations, oxidative stress, and  
527 apoptosis in mammalian aging. *Science* **309**: 481-4
- 528 32. Pickrell AM, Huang CH, Kennedy SR, Ordureau A, Sideris DP, Hoekstra JG, Harper JW,  
529 Youle RJ (2015) Endogenous Parkin Preserves Dopaminergic Substantia Nigral Neurons  
530 following Mitochondrial DNA Mutagenic Stress. *Neuron* **87**: 371-81
- 531 33. Valente EM, Abou-Sleiman PM, Caputo V, Muqit MM, Harvey K, Gispert S, Ali Z, Del  
532 Turco D, Bentivoglio AR, Healy DG, *et al.* (2004) Hereditary early-onset Parkinson's disease  
533 caused by mutations in PINK1. *Science* **304**: 1158-60
- 534 34. Kitada T, Asakawa S, Hattori N, Matsumine H, Yamamura Y, Minoshima S, Yokochi M,  
535 Mizuno Y, Shimizu N (1998) Mutations in the parkin gene cause autosomal recessive juvenile  
536 parkinsonism. *Nature* **392**: 605-8
- 537 35. Kraytsberg Y, Kudryavtseva E, McKee AC, Geula C, Kowall NW, Khrapko K (2006)  
538 Mitochondrial DNA deletions are abundant and cause functional impairment in aged human  
539 substantia nigra neurons. *Nat Genet* **38**: 518-20
- 540 36. Bender A, Krishnan KJ, Morris CM, Taylor GA, Reeve AK, Perry RH, Jaros E, Hersheson  
541 JS, Betts J, Klopstock T, *et al.* (2006) High levels of mitochondrial DNA deletions in substantia  
542 nigra neurons in aging and Parkinson disease. *Nat Genet* **38**: 515-7
- 543 37. Brenner S (1974) The genetics of *Caenorhabditis elegans*. *Genetics* **77**: 71-94
- 544 38. Valmas N, Zuryn S, Ebert PR (2008) Mitochondrial uncouplers act synergistically with  
545 the fumigant phosphine to disrupt mitochondrial membrane potential and cause cell death.  
546 *Toxicology* **252**: 33-39
- 547 39. Zuryn S, Kuang J, Ebert P (2008) Mitochondrial modulation of phosphine toxicity and  
548 resistance in *Caenorhabditis elegans*. *Toxicological Sciences* **102**: 179-186

Ahier et al. Brief Report

- 549 40. Benedetti C, Haynes CM, Yang Y, Harding HP, Ron D (2006) Ubiquitin-like protein 5  
550 positively regulates chaperone gene expression in the mitochondrial unfolded protein  
551 response. *Genetics* **174**: 229-39
- 552 41. Neumann B, Coakley S, Giordano-Santini R, Linton C, Lee ES, Nakagawa A, Xue D,  
553 Hilliard MA (2015) EFF-1-mediated regenerative axonal fusion requires components of the  
554 apoptotic pathway. *Nature* **517**: 219-22  
555
- 556
- 557

Ahier et al. Brief Report

558

559 **Figure Legends**

560

561 **Figure 1. *Pink-1* and *pdr-1* are required for establishing differences in  $\Delta$ mtDNA**  
562 **heteroplasmy between major tissue types. (A)** Overview of mitochondrial  
563 immunoprecipitation from specific tissues in *pink-1(tm1779);pdr-1(gk488)* double  
564 mutants harbouring  $\Delta$ mtDNA. **(B-F)** Relative heteroplasmy differences in  
565 mitochondria isolated from each cell type in wild type and *pink-1(tm1779);pdr-*  
566 *1(gk488)* backgrounds. Bars are means  $\pm$  s.e.m. of three independent biological  
567 replicates (dots) consisting of  $\sim$ 10,000 animals each. \* =  $p < 0.05$ ; \*\* =  $p < 0.01$ . *P*  
568 values were determined using one-way ANOVA and Tukey's correction. Comparison  
569 of heteroplasmy between tissues in **(G)** wild-type animals and **(H)** *pink-*  
570 *1(tm1779);pdr-1(gk488)* double mutants indicates that inter-tissue differences in  
571  $\Delta$ mtDNA heteroplasmy is abolished by removing *pink1* and *pdr-1*. **(I)** Graphical  
572 representation of heteroplasmy divergence (relative to body wall muscle) between  
573 tissues in each background. The significance of heteroplasmy variation between  
574 tissues was calculated using one-way ANOVA. \*\* =  $p < 0.01$ ; \*\*\* =  $p < 0.001$ . *P* values  
575 were determined using one-way ANOVA and Tukey's correction. **(J)** Quantitative  
576 PCR analysis of mtDNA copy number in L4 wild type and *pink-1(tm1779);pdr-*  
577 *1(gk488)* double mutants. Columns are means  $\pm$  s.e.m. of three independent  
578 biological replicates (dots), each consisting of 10 animals, analysed with Student's t-  
579 test.

580

581 **Figure 2. *Pink-1* and *pdr-1* are required for mitophagy in body wall muscle**  
582 **cells. (A)** PINK-1 translational reporter is expressed in most somatic tissues in *C.*



Ahier et al. Brief Report

583 *C. elegans*, including the body wall muscle. White box is magnified in the panels on the  
584 left and body muscle cells are outlined in white dashed lines. White scale bar, 50 $\mu$ m;  
585 red scale bar, 5 $\mu$ m. **(B)** Quantification of mitophagy in body wall muscle cells.  
586 Columns are means  $\pm$  s.e.m. of independent animals (grey and black dots). \*\* =  $p <$   
587 0.01. *P* values were determined using Student's t-test. **(C)** Representative images  
588 and three-dimensional reconstructions of the *C. elegans* body wall muscle  
589 mitochondrial network. These representative figures have been constructed from  
590 high magnification (40x) z-stack images of live animals stitched together and three-  
591 dimensionally reconstructed. **(D)** Quantification of body wall muscle mitochondrial  
592 volume. Columns are means  $\pm$  s.e.m. of individual animals (black dots). \*\* =  $p <$  0.01,  
593 *P* values were determined using Student's t-test.

594

595 **Figure 3.  $\Delta$ mtDNA induces mitochondrial dysfunction and mitophagy in**  
596 **muscle cells and neurons.** **(A)** Representative micrographs taken of live animals  
597 expressing tissue-specific GFP reporters (*myo-3p::GFP<sup>mt</sup>*, body wall muscle and  
598 *mec-4p::<sup>MTS</sup>GFP*, mechanosensory neurons) localised to the mitochondria and  
599 stained with the mitochondrial membrane potential sensitive dye, TMRE (pseudo-  
600 coloured magenta). Scale bar, 10 $\mu$ m. **(B)** Quantification of mean TMRE intensity  
601 from mitochondria of each tissue type. a.u., arbitrary units. Columns are means  $\pm$   
602 s.e.m., each dot is the mean TMRE intensity calculated from an independent animal.  
603 \*\* =  $p <$  0.01. *P* values were determined using Student's t-test. **(C)** Quantification of  
604 mtDNA molecules per mitochondrion. Each dot represents an independent  
605 experiment in which the average number of mtDNA molecules per mitochondrion ( $n$   
606  $>$  1,000 mitochondria per sample) were calculated. Bars are means of three  
607 biologically independent experiments  $\pm$  s.e.m. \*\* =  $p <$  0.01; \*\*\* =  $p <$  0.001. *P* values

Ahier et al. Brief Report

608 were determined using one-way ANOVA and Tukey's correction. **(D)** Quantification  
609 of mitophagy in body wall muscle cells and neurons. Columns are means  $\pm$  s.e.m.,  
610 each dot represents an independent animal analysed. \* =  $p < 0.05$ ; \*\* =  $p < 0.01$ ; \*\*\* =  
611  $p < 0.001$ ; \*\*\*\* =  $p < 0.0001$ . *P* values were determined using one-way ANOVA and  
612 Tukey's correction.

613

614 **Figure 4. Proteotoxicity increases  $\Delta$ mtDNA heteroplasmy in neurons. (A)**

615 Overview of the genetic strains used to isolate mitochondria from neurons  
616 overexpressing proteotoxic species. **(B)** Expression of either human tau (hTau) or a  
617 polyglutamine tract (Q40) in neurons increases  $\Delta$ mtDNA levels in the nervous  
618 system. Bars are means  $\pm$  s.e.m. of at least three independent biological replicates  
619 (dots). \*\*\* =  $p < 0.001$ . *P* values were determined using one-way ANOVA and  
620 Tukey's correction. **(C)** Proposed model.

621

622 **Supplemental Figure Legends**

623 **Figure S1.  $\Delta$ mtDNA heteroplasmy and genetic overview. (A)** Quantification of

624 *uadF5* heteroplasmy in whole animal extracts. Heteroplasmy was stable at around  
625 50-60% for each of the strains used. Bar represents the mean value of three  
626 independent experiments  $\pm$  s.e.m. **(B)** Schematic of *C. elegans* mtDNA showing the  
627 location of the 3.1kb *uadF5* deletion.

628

629 **Figure S2. Perturbing mitophagy increases mitochondrial volume in body wall**

630 **muscle cells. (A)** Representative microimages of body wall muscle mitochondria.  
631 White scale bar, 50 $\mu$ m; red scale bar, 5 $\mu$ m. All images are stitched together from  
632 multiple high magnification (40x) z-stack images of live animals (see materials and

Ahier et al. Brief Report

633 methods). **(B)** Quantification of mitochondrial. Columns are means  $\pm$  s.e.m. of  
634 individual animals (black dots). \*\* =  $p < 0.01$ . *P* values were determined using  
635 Student's t-test.

636

637 **Figure S3.  $\Delta$ mtDNA does not alter mitochondrial morphology or volume in**  
638 **body wall muscle cells and neurons.** Representative microimages of body wall  
639 muscle **(A)** and **(D)** motor neuron mitochondria. White scale bar, 50 $\mu$ m; red scale  
640 bar, 5 $\mu$ m. All images are stitched together from multiple high magnification (40x) z-  
641 stack images of live animals (see materials and methods). Quantification of  
642 mitochondrial volumes from **(B-C)** body wall muscle cells and **(E-F)** motor neurons.  
643 Columns are means  $\pm$  s.e.m. of individual animals (black dots).

644

645

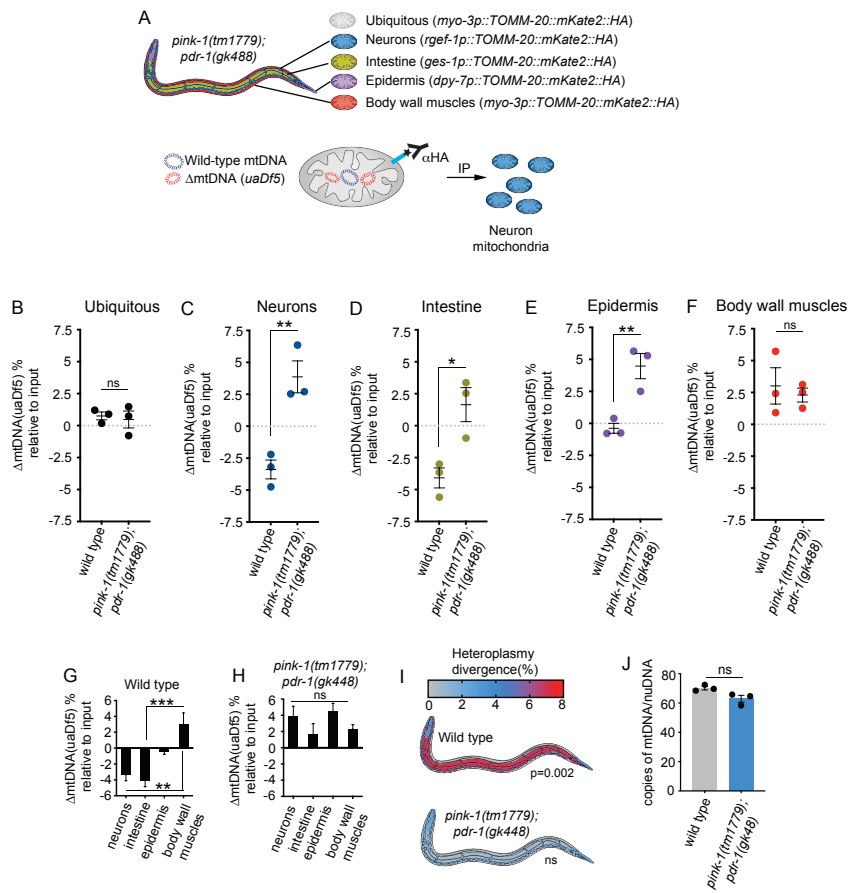

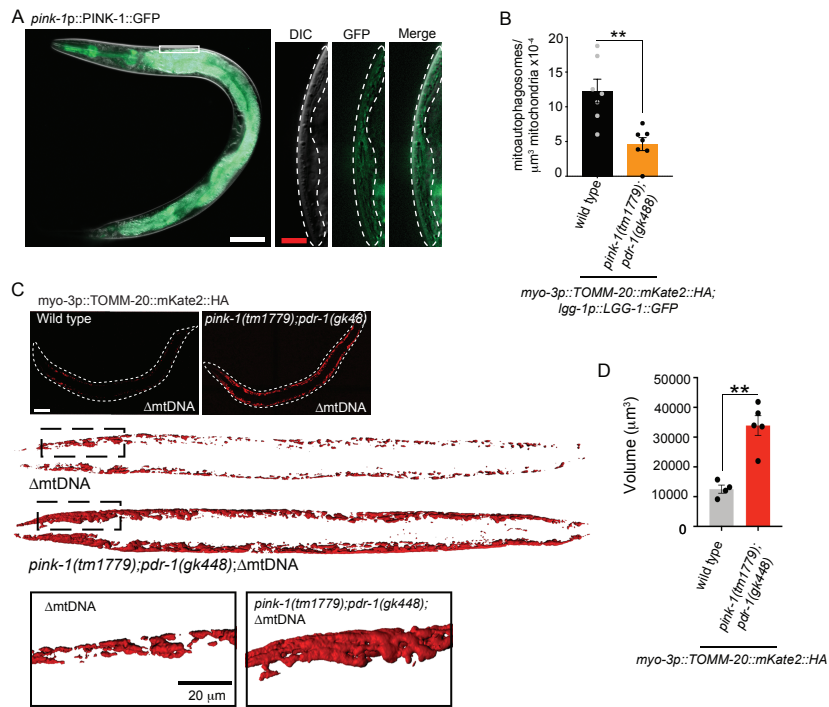

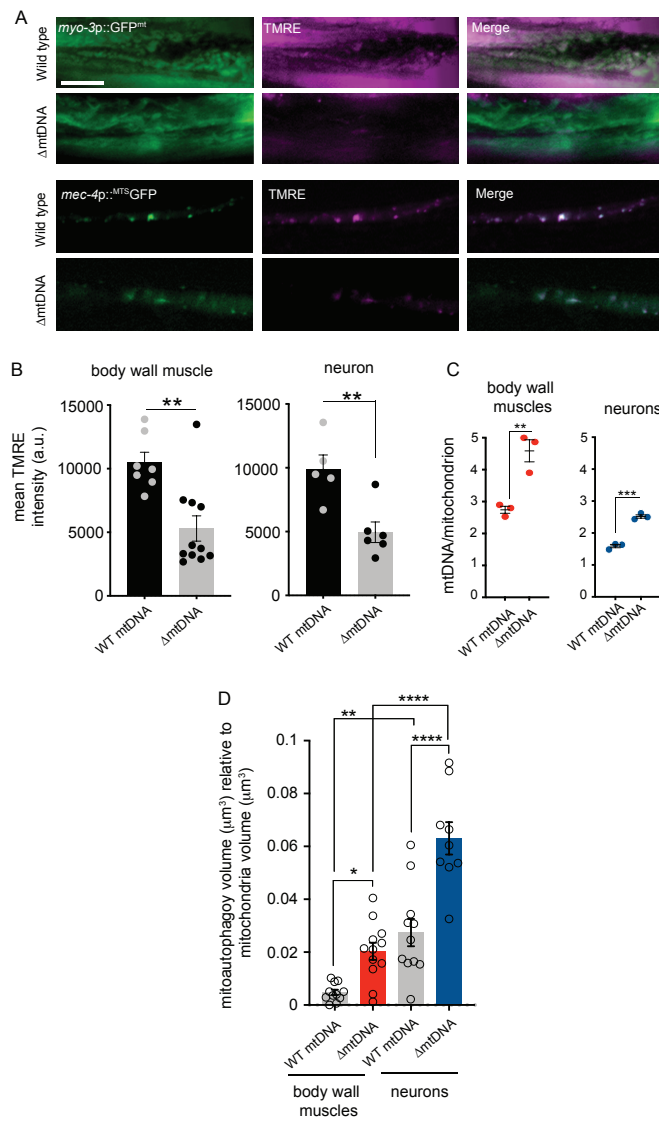

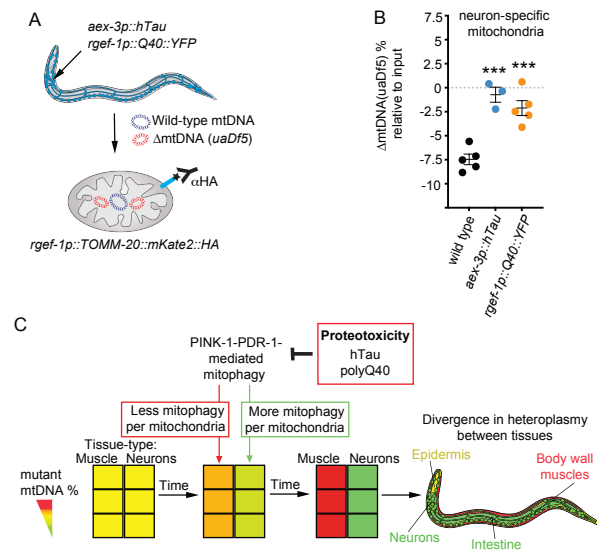

Source: https://www.biorxiv.org/content/biorxiv/early/2020/06/12/576165.full.pdf
